# Supplementary material
Source: PubMed Central journal article supplement (PMC8753508)
Supplement: jama-e2123619-s004.pdf [file jama-e2123619-s004.pdf]

\*Indicates required information. Only first name, last name, and suffix will appear in PubMed.

| <b>*Group Name(s): The STEP 8 Investigators</b> |                   |                              |                  |                                                             |                                          |                                                         |                                                                                            |
|-------------------------------------------------|-------------------|------------------------------|------------------|-------------------------------------------------------------|------------------------------------------|---------------------------------------------------------|--------------------------------------------------------------------------------------------|
| <b>*First Name and Middle Initial(s)</b>        | <b>*Last Name</b> | <b>*Suffix (eg, Jr, III)</b> | Academic Degrees | Institution                                                 | Location (city, state/province, country) | Role or Contribution, eg, chair, principal investigator | Group (if more than 1 Group listed in the byline and/or Subgroup (eg, Steering Committee)) |
| Carlos                                          | Arauz-Pacheco     |                              | MD               | Carlos Arauz-Pacheco MD, PA                                 | Rockwall, TX, USA                        | Principal investigator                                  |                                                                                            |
| Kevin                                           | Cannon            |                              | MD               | PMG Research of Wilmington, LLC                             | Wilmington, NC, USA                      | Principal investigator                                  |                                                                                            |
| H. Jackson                                      | Downey            |                              | MD               | Westside Center For Clinical Research                       | Jacksonville, FL, USA                    | Principal investigator                                  |                                                                                            |
| David                                           | Fitz-Patrick      |                              | MD               | East West Medical Research Institute                        | Honolulu, HI, USA                        | Principal investigator                                  |                                                                                            |
| Jeffrey                                         | Geohas            |                              | MD               | Evanston Premier Healthcare Research, LLC                   | Evanston, IL, USA                        | Principal investigator                                  |                                                                                            |
| Gregg                                           | Gerety            |                              | MD               | Albany Medical College, Division of Community Endocrinology | Albany, NY, USA                          | Principal investigator                                  |                                                                                            |
| John                                            | Gilbert           |                              | MD               | St. Joseph Heritage Healthcare                              | Fullerton, CA, USA                       | Principal investigator                                  |                                                                                            |
| Priscilla                                       | Hollander         |                              | MD, PhD          | Baylor Scott & White Endocrine Center, Dallas               | Dallas, TX, USA                          | Principal investigator                                  |                                                                                            |
| Eric                                            | Klein             |                              | MD               | Capital Clinical Research Center, LLC                       | Olympia, WA, USA                         | Principal investigator                                  |                                                                                            |
| Karen                                           | Laufer            |                              | M.D.             | Clinical Trial Research Associates, Inc                     | Plantation, FL, USA                      | Principal investigator                                  |                                                                                            |
| Philip                                          | O'Donnell         |                              | MD               | Selma Medical Associates                                    | Winchester, VA, USA                      | Principal investigator                                  |                                                                                            |
| Paul                                            | Rosenblit         |                              | MD, PhD          | Diabetes/Lipid Management & Research Center                 | Huntington Beach, CA, USA                | Principal investigator                                  |                                                                                            |
| Phillip                                         | Toth              |                              | MD               | Midwest Institute For Clinical Research                     | Indianapolis; IN, USA                    | Principal investigator                                  |                                                                                            |
|                                                 |                   |                              |                  |                                                             |                                          |                                                         |                                                                                            |
|                                                 |                   |                              |                  |                                                             |                                          |                                                         |                                                                                            |
|                                                 |                   |                              |                  |                                                             |                                          |                                                         |                                                                                            |
